# Supplementary material
Source: MDPI journal article supplement (https://www.mdpi.com/2079-6412/11/1/60)
Supplement: s1 [file s1]

# Supplementary Materials: Study of the Effect of Physicochemical Degradation and Contamination of Motor Oils on Their Lubricity

Marie Sejkorová <sup>1,\*</sup>, Ivana Hurtová <sup>1</sup>, Petr Jilek <sup>2</sup>, Martin Novák <sup>3</sup> and Ondřej Voltr <sup>1</sup>

<sup>1</sup> Department of Transport Means and Diagnostics, Faculty of Transport Engineering, University of Pardubice, Studentská 95, 532 10 Pardubice, Czech Republic; ivana.hurtova@upce.cz (I.H.); ondrej.voltr@upce.cz (O.V.)

<sup>2</sup> Educational and Research Centre in Transport, Faculty of Transport Engineering, University of Pardubice, Studentská 95, 532 10 Pardubice, Czech Republic; petr.jilek@upce.cz

<sup>3</sup> Department of Transport Management, Marketing and Logistics, Faculty of Transport Engineering, University of Pardubice, Studentská 95, 532 10 Pardubice, Czech Republic; novak@upce.cz

\* Correspondence: marie.sejkorova@upce.cz

## 1. Photo Documentation of Wear Surfaces of Steel Rollers from the Lubricity Test of Motor Oils According to Reichert

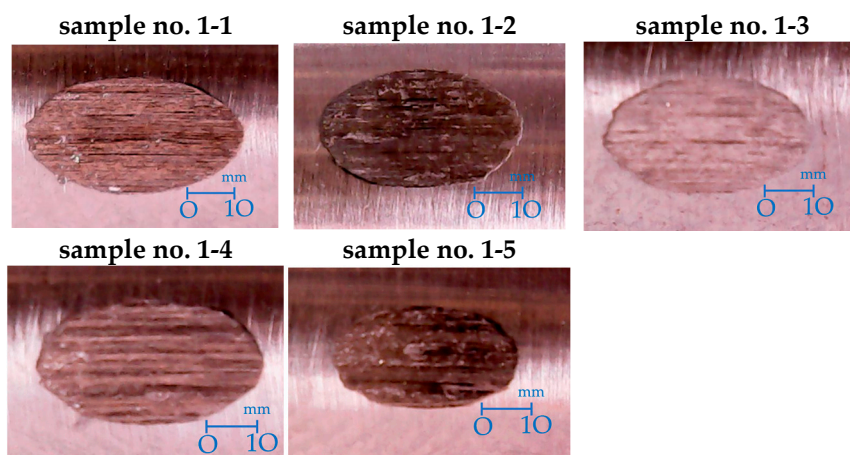

**Figure 1-1.** The wear surfaces of steel rollers from the lubricity test of motor oils M7ASD III.

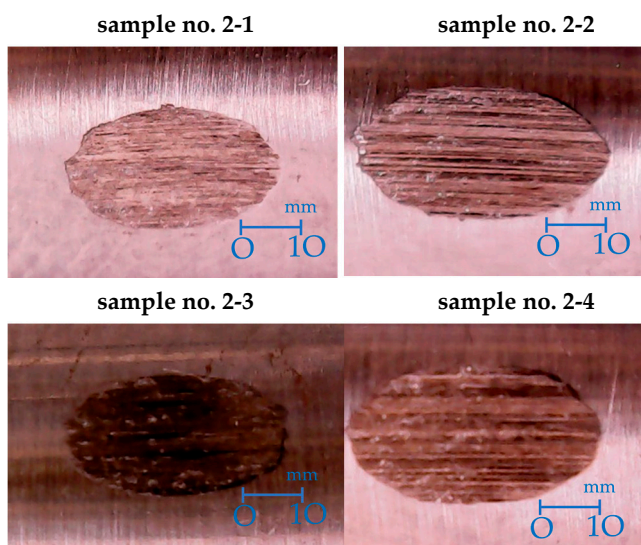

**Figure S1-2.** The wear surfaces of steel rollers from the lubricity test of motor oils M7ASD V.

**Citation:** Sejkorová, M.; Hurtová, I.; Jilek, P.; Novák, M.; Voltr, O. Study of the Effect of Physicochemical Degradation and Contamination of Motor Oils on their Lubricity. *Coatings* **2021**, *11*, 60. <https://doi.org/10.3390/11010060>

Received: 19 October 2020  
Accepted: 31 December 2020  
Published: 7 January 2021

**Publisher's Note:** MDPI stays neutral with regard to jurisdictional claims in published maps and institutional affiliations.

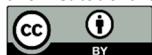

**Copyright:** © 2020 by the authors. Submitted for possible open access publication under the terms and conditions of the Creative Commons Attribution (CC BY) license (<http://creativecommons.org/licenses/by/4.0/>).

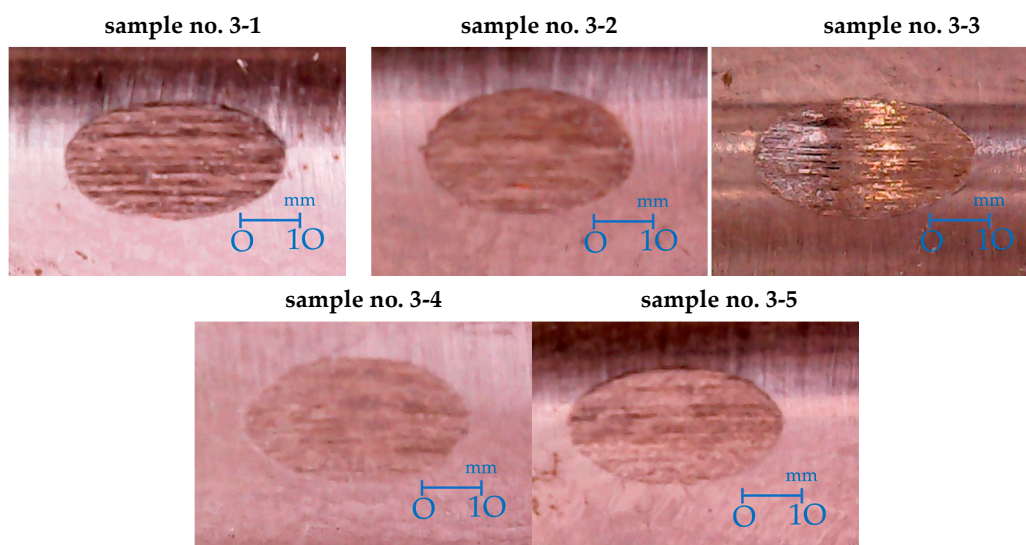

Figure S1-3. The wear surfaces of steel rollers from the lubricity test of motor oils URANIA LD.

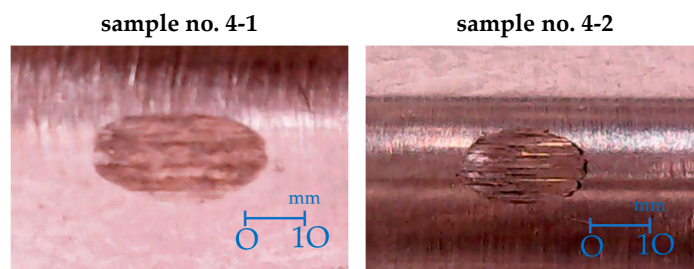

Figure S1-4. The wear surfaces of steel rollers from the lubricity test of motor oils OMV motor oils.

## 2. The Spectra of Motor Oils, on the Basis of which the Content of Antioxidant and Anti-Wear Additive ZDDP, Soot, Fuel, Water, and Oxidation, Nitration and Sulfation Products WAS Determined.

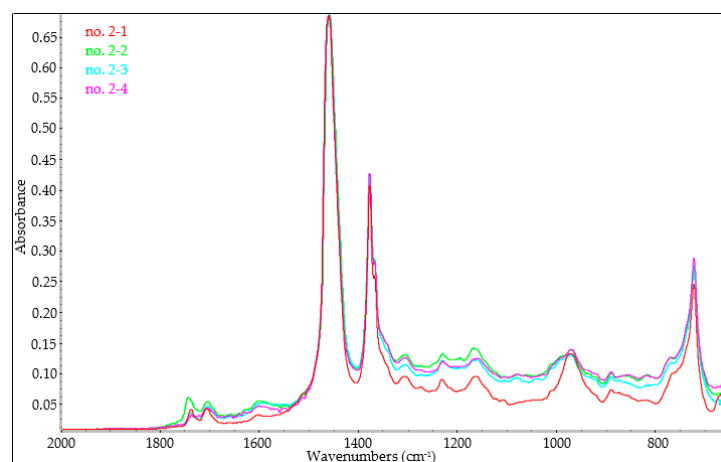

Figure S2-1. FTIR spectrum of motor oils M7ADS III.

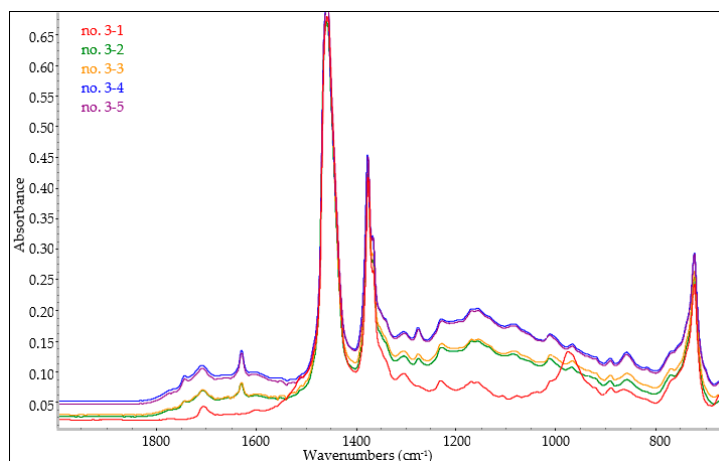

Figure S2-2. FTIR spectrum of motor oils M7ADS V.

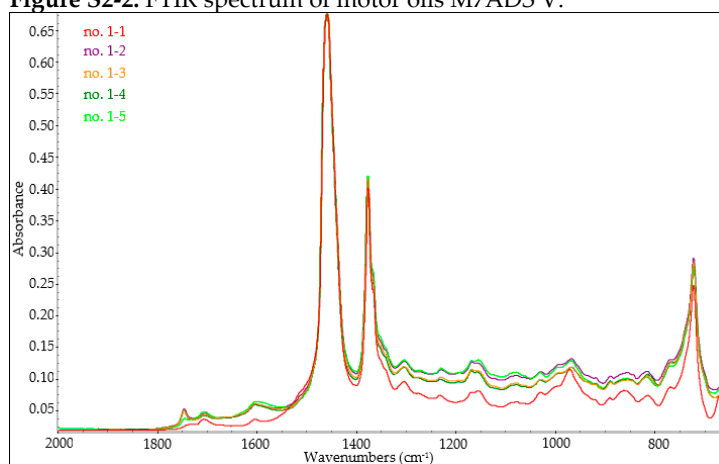

Figure S2-3. FTIR spectrum of motor oils URANIA LD.

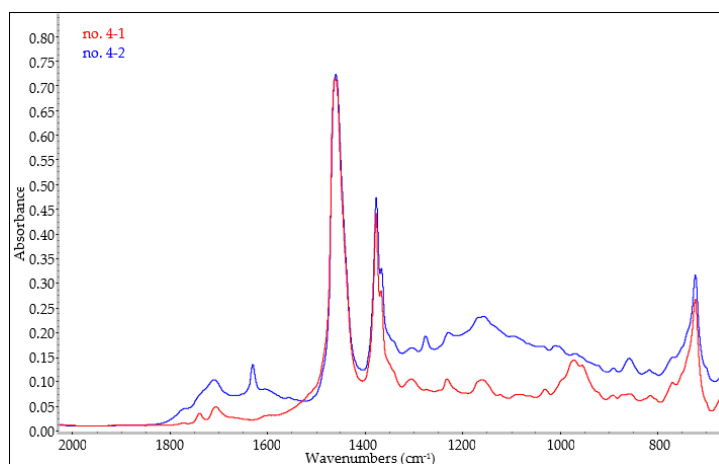

Figure S2-4. FTIR spectrum of motor oils OMV.
